# Supplementary material for: Energy-resolved and time-dependent unimolecular dissociation of hydroperoxyalkyl radicals (˙QOOH)
Source: Royal Society of Chemistry journal article supplement (doi:10.1039/d2fd00008c), 2022-01-01
Supplement: d2fd00008c1.pdf [file d2fd00008c1.pdf]

Supplementary Information:  
Energy-resolved and time-dependent unimolecular dissociation of  
hydroperoxyalkyl radicals ( $\bullet$ QOOH)

Trisha Bhagde<sup>1\*</sup>, Anne S. Hansen<sup>1\*</sup>, Shuguang Chen<sup>1</sup>, Patrick J. Walsh<sup>1</sup>,  
Stephen J. Klippenstein<sup>2</sup>, and Marsha I. Lester<sup>1</sup>

<sup>1</sup> Department of Chemistry, University of Pennsylvania, Philadelphia, PA 19104-6323, USA

<sup>2</sup> Chemical Sciences and Engineering Division, Argonne National Laboratory, Lemont, IL 60439, USA

Table of Contents

|                                                       |    |
|-------------------------------------------------------|----|
| S1. Methods.....                                      | 2  |
| S1.1. Deuteration of hydroperoxy moiety of TBHP ..... | 2  |
| S1.2. Experimental .....                              | 2  |
| S2. Schemes .....                                     | 4  |
| Scheme S1.....                                        | 4  |
| Scheme S2.....                                        | 5  |
| S3. Figures.....                                      | 6  |
| Figure S1.....                                        | 6  |
| Figure S2.....                                        | 7  |
| Figure S3.....                                        | 8  |
| Figure S4.....                                        | 9  |
| Figure S5.....                                        | 10 |
| Table S1 .....                                        | 11 |
| Table S2.....                                         | 12 |
| Table S3 .....                                        | 13 |
| Table S4.....                                         | 14 |

## S1. Methods

### S1.1. Deuteration of the TBHP hydroperoxyl group

A commercial sample of *tert*-butyl hydroperoxide ( $(\text{CH}_3)_3\text{COOH}$ , ACROS Organics, 70% TBHP aqueous solution) is dried using the procedure described previously.<sup>1,2</sup> The dried sample of 5 mL TBHP in a 100 mL round bottom flask is dissolved in 30 mL methylene chloride (DCM Stabilized/Certified ACS, Fisher Chemical). Next, 10 mL of  $\text{D}_2\text{O}$  (deuterium oxide, D 99.9%, Cambridge Isotope Laboratories) is added with continuous stirring for 20 minutes. This mixture is transferred to a 250 mL separatory funnel. Once the aqueous layer ( $\text{D}_2\text{O}$ ) and DCM layer separate, the DCM layer is collected in a round bottom flask. The DCM layer is then resubjected to the deuteration procedure 8–9 times with fresh 10 mL charges of  $\text{D}_2\text{O}$ . Once the desired amount of deuteration is achieved, as judged by  $^1\text{H}$  NMR integration of the residual O–H peak against the *tert*-butyl group in  $\text{CDCl}_3$ , the DCM layer is dried over anhydrous  $\text{MgSO}_4$  for 1 h. The DCM layer is filtered into a round bottom flask and concentrated under reduced pressure for 20 min at room temperature. To further reduce the residual DCM in the final peroxide product, the flask is attached to a vacuum line for  $\sim 2$  h. After this period, approximately 2 mL colorless liquid *tert*-BuOOD is recovered. Note that care must be used when removing the residual  $\text{CH}_2\text{Cl}_2$  in order to not evaporate all the desired peroxide product.  $^1\text{H}$  NMR integration of the *tert*-butyl group against the residual OH (Figure S1) gave a ratio of approximately 134:1 (Figure S2), indicating a percentage deuteration of ca. 93% at the hydroperoxy moiety.

### S1.2. Experimental

A carrier gas composed of 0.25%  $\text{Cl}_2$  (Airgas), 25% He, and 75% Ar (Praxair) at a pressure of 40 psi is used to entrain the vapor of dried and deuterated  $(\text{CH}_3)_3\text{COOD}$  (TBDP). Due to the presence of corrosive  $\text{Cl}_2$ , the sample line is constructed using Hastelloy (McMaster Carr) and Teflon tubing. A solenoid valve (Parker General Valve Series 9) with an affixed quartz capillary reactor tube ( $\sim 25$  mm length and 1 mm ID) pulses the gas mixture into a vacuum chamber. Cl atoms are generated by photolyzing  $\text{Cl}_2$  along the length of the capillary tube using the cylindrically focused third harmonic output of a Nd:YAG laser (Continuum Powerlite Precision 8000, 355 nm,  $\sim 5$  mJ/pulse, 10 Hz). The photolytically generated Cl atoms can abstract one of the nine H-atoms associated with the three methyl groups of TBDP.<sup>3</sup> This results in the formation of the partially deuterated 2-deuteroperoxy-2-methylprop-1-yl ( $\bullet\text{CH}_2(\text{CH}_3)_2\text{COOD}$  or  $\bullet\text{QOOD}$ ) and HCl products as shown in Scheme S1. The resultant  $\bullet\text{QOOD}$  along with the other components of the carrier gas mixture subsequently undergo a supersonic jet expansion resulting in collisional stabilization and cooling of  $\bullet\text{QOOD}$  to a rotational temperature of ca. 10 K.<sup>4,5</sup>

Approximately 1 cm downstream, the gas mixture is intersected by counter-propagating and spatially overlapped IR-pump and UV-probe laser beams focused to ca. 3 and 5 mm diameters, respectively. A KDP crystal (Inrad) is used to frequency double the output of an Nd:YAG (Continuum 7020; 532 nm, 10 Hz) pumped dye laser (ND6000, Rhodamine 590 and 610 dye) to obtain the UV probe beam ( $\sim 3$  mJ/pulse,  $\sim 6$  ns FWHM). The signal output of an optical parametric oscillator/amplifier (OPO/OPA, Laservision;  $0.9 \text{ cm}^{-1}$  bandwidth) pumped by a Nd:YAG laser (1064 nm, Continuum Surelite EX, 5 Hz) is the tunable IR pump beam ( $\sim 30$  mJ/pulse,  $\sim 6$  ns FWHM). IR activation of  $\bullet\text{QOOD}$  generates OD  $X^2\Pi_{3/2}$  ( $v=0$ ) products as shown in Scheme S2. UV laser-induced fluorescence (LIF) on the OD  $A^2\Sigma^+ - X^2\Pi_{3/2}$  (1,0)  $Q_1(3.5)$  transition is used to probe the resultant OD products.

IR action spectra of  $\bullet\text{QOOD}$  are obtained by introducing the IR pump beam 50 – 100 ns prior to the UV probe beam and scanning the IR wavelength. Lifetime measurements are carried out with fixed IR excitation while the time delay between the IR pump and UV probe is scanned using a digital delay generator (BNC model 565). The OD  $A^2\Sigma^+ - X^2\Pi_{3/2}$  (1,1) fluorescence is collected using  $f/1$  optics, which is passed through a 313 nm bandpass filter (OD 4, Edmund Optics) and detected with a gated photomultiplier tube (Electron Tubes 9813QB PMT). The LIF signal is preamplified and displayed on an oscilloscope (LeCroy WaveRunner 44Xi) interfaced with a computer for processing. Background OD LIF signal, not induced by IR excitation, is removed by an active background subtraction scheme (IR on – IR off).<sup>6</sup> Additional details about the experimental setup are given in Refs. 7-9.

The overall temporal profile is fitted with a dual exponential function,  $F(t)$ :

$$F(t) = A \exp\left(-k_{\text{fall}}t + \frac{1}{4} k_{\text{fall}}^2 (\Delta t_{\text{IR}}^2 + \Delta t_{\text{UV}}^2)\right) - B \exp\left(-(k_{\text{fall}} + k_{\text{rise}})t + \frac{1}{4} (k_{\text{fall}} + k_{\text{rise}})^2 (\Delta t_{\text{IR}}^2 + \Delta t_{\text{UV}}^2)\right) \quad (\text{S1})$$

Here,  $A$  and  $B$  are amplitudes of the fit,  $k_{\text{rise}}$  and  $k_{\text{fall}}$  are the rise and fall in OD LIF intensity, and  $\Delta t_{\text{IR}}$  ( $2.8 \pm 0.1$  ns) and  $\Delta t_{\text{UV}}$  ( $3.0 \pm 0.1$  ns) are the IR and UV temporal pulse widths (Gaussian), respectively. This yields a time resolution of  $\Delta t = 4.1 \pm 0.1$  ns and corresponds to a full width at half maximum (FWHM) of  $6.9 \pm 0.1$  ns. The experimental rate for appearance of OD products is determined to be  $k_{\text{rise}} = 1.0 \pm 0.3 \times 10^8 \text{ s}^{-1}$ , corresponding to a risetime of  $9.8 \pm 3.0$  ns, with uncertainty ( $\pm 1\sigma$ ) derived from repeated measurements.  $k_{\text{rise}}$  is insensitive to the ca. 150 times slower  $k_{\text{fall}}$  ( $k_{\text{fall}} = 6.9 \pm 0.3 \times 10^5 \text{ s}^{-1}$ ;  $\tau_{\text{fall}} = 1450 \pm 50$  ns based on typical measurements).<sup>9</sup>

## S2. Schemes

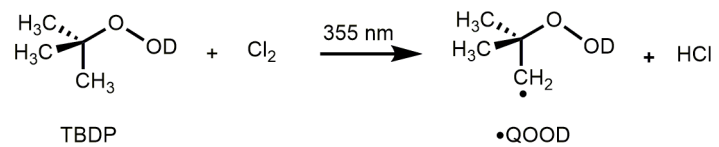

Scheme S1: Chlorine radicals generated by 355 nm photolysis of Cl<sub>2</sub> abstract a hydrogen atom from one of the methyl groups of TBDP resulting in the formation of •QOOD and HCl.

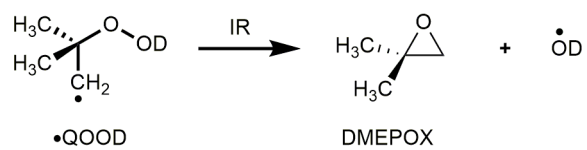

Scheme S2: IR excitation of  $\bullet\text{QOOD}$  on the overtone OD stretch results in unimolecular decay to 2,2-dimethyl epoxide (DMEPOX) and OD products, the latter of which is detected by LIF.

S3. Figures

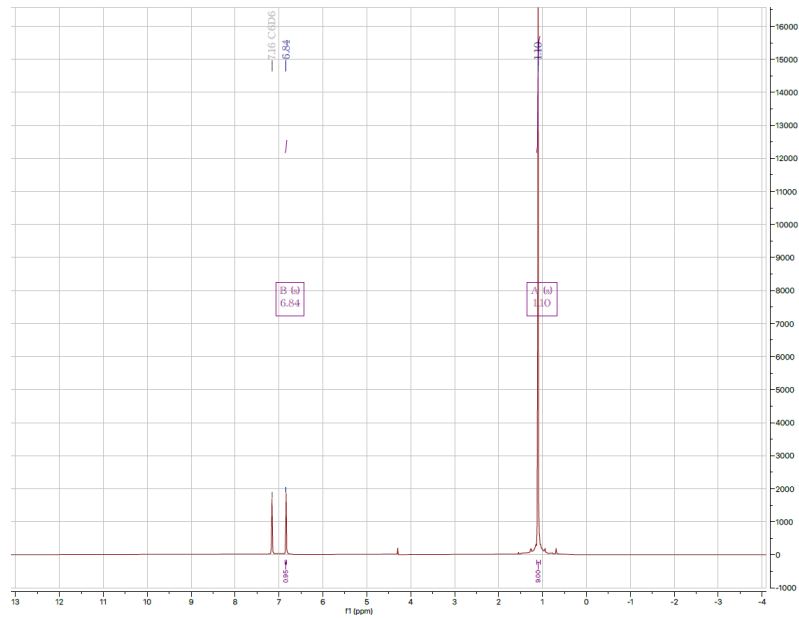

Figure S1: <sup>1</sup>H NMR of dried TBHP in C<sub>6</sub>D<sub>6</sub> showing a ratio of protons from the methyl to the hydroperoxy group as 9:1.

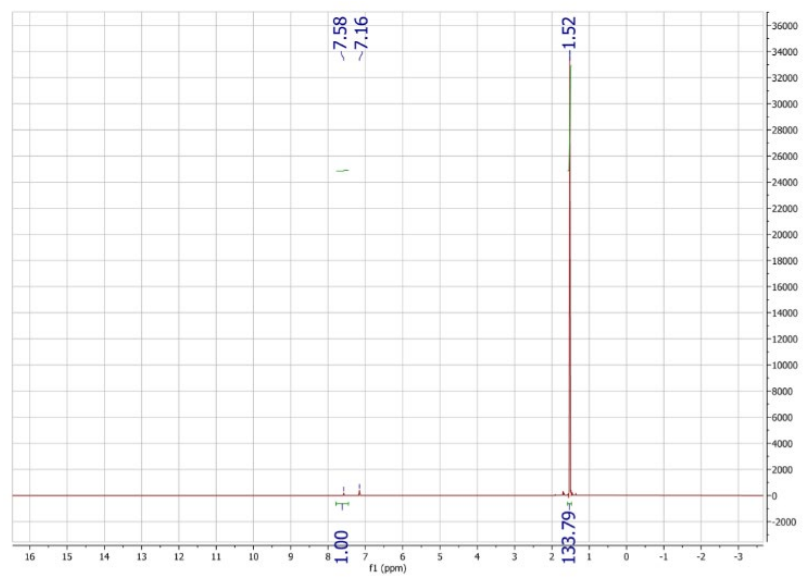

Figure S2: <sup>1</sup>H NMR of TBDP in C<sub>6</sub>D<sub>6</sub> showing a ratio of protons from the methyl to the hydroperoxy group as 134:1, indicating partial deuteration of 93% of the H atom at the hydroperoxy site.

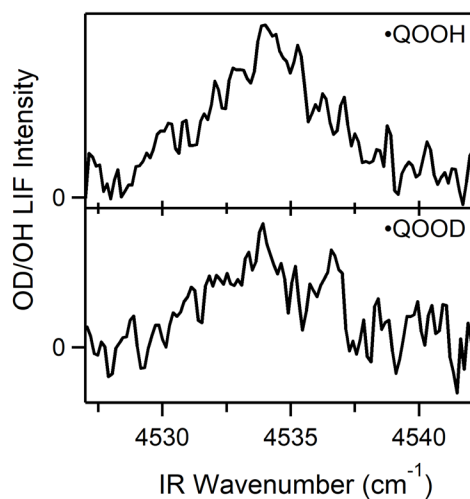

Figure S3: Experimental IR action spectra of the  $\nu_{\text{CH}_2} + \delta_{\text{CH}_2}$  transition peaking at  $4534.0 \text{ cm}^{-1}$  for both  $\bullet\text{QOOH}$  and  $\bullet\text{QOOD}$  with OH and OD LIF detection, respectively, recorded at a 100 ns time delay between the IR pump and UV probe lasers.<sup>10</sup> Both the computed and observed  $\nu_{\text{CH}_2} + \delta_{\text{CH}_2}$  transitions are unchanged (Table 1) upon deuteration of the hydroperoxy (OOH/D) group. The intensities are in arbitrary units, although the signal level achieved for  $\bullet\text{QOOD}$  is weaker.



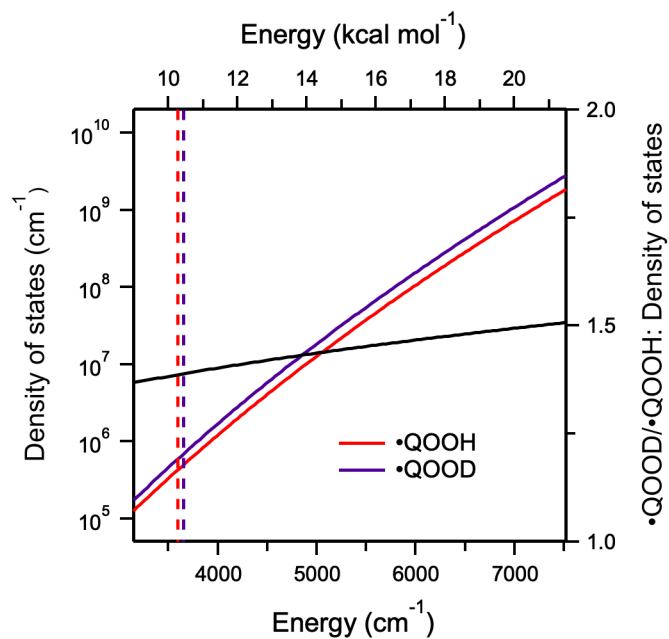

Figure S4: The density of states for •QOOH (red) and •QOOD (purple) used to determine the RRKM dissociation rates in Figure 5, along with the ratio of the •QOOD to •QOOH density of states (black). The increase in density of states for •QOOD results from the frequency changes that occur upon deuteration. The vertical dashed lines indicate the slightly higher transition state (TS) barrier for •QOOD (10.5 kcal mol<sup>-1</sup>, purple) compared to that for •QOOH (10.3 kcal mol<sup>-1</sup>, red).

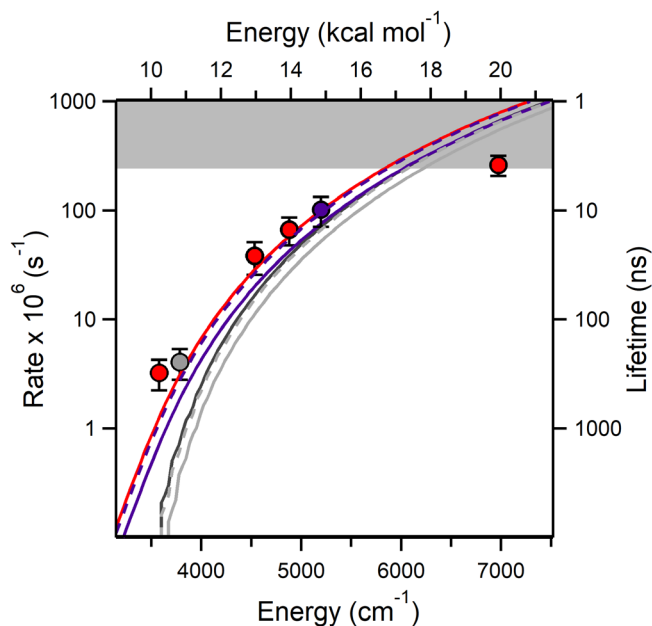

Figure S5: Rates and lifetimes (semi-log scale) for the unimolecular decay reactions of  $\bullet$ QOOD and  $\bullet$ QOOH reproduced from Figure 5 in main text. The experimental rates are given by the circles ( $\bullet$ QOOD in purple and  $\bullet$ QOOH in red and gray) with error bars ( $\pm 1\sigma$ ) derived from repeated measurements. RRKM rates and lifetimes are calculated with tunneling (solid lines,  $\bullet$ QOOD in purple and  $\bullet$ QOOH in red) and without tunneling (solid lines,  $\bullet$ QOOD in light gray and  $\bullet$ QOOH in dark gray). The additional dashed lines are decay rates predicted for  $\bullet$ QOOD with the TS barrier artificially set at  $10.3 \text{ kcal mol}^{-1}$ , the same as that for  $\bullet$ QOOH, with (purple) and without (gray) tunneling. The gray shaded region indicates rates limited by the experimental time resolution (4 ns).

Table S1: Calculated fundamental harmonic and anharmonic frequencies and intensities of •QOOD using different methods.

| Number | Harmonic                         |                                  |                                      | Anharmonic                       |                                  |                                                   |
|--------|----------------------------------|----------------------------------|--------------------------------------|----------------------------------|----------------------------------|---------------------------------------------------|
|        | CCSD(T) <sup>a</sup>             | B2PLYP-D3 <sup>b</sup>           |                                      | CCSD(T) <sup>c</sup>             | B2PLYP-D3 <sup>b</sup>           |                                                   |
|        | Frequency<br>(cm <sup>-1</sup> ) | Frequency<br>(cm <sup>-1</sup> ) | Intensity<br>(km mol <sup>-1</sup> ) | Frequency<br>(cm <sup>-1</sup> ) | Frequency<br>(cm <sup>-1</sup> ) | Intensity<br>(km mol <sup>-1</sup> ) <sup>d</sup> |
| 1      | 3259                             | 3278                             | 7.36                                 | 3118                             | 3137                             | 7.78                                              |
| 2      | 3145                             | 3165                             | 9.83                                 | 3028                             | 3049                             | 19.5                                              |
| 3      | 3141                             | 3154                             | 12.5                                 | 3006                             | 3019                             | 14.7                                              |
| 4      | 3132                             | 3144                             | 19.1                                 | 3012                             | 3024                             | 16.4                                              |
| 5      | 3128                             | 3141                             | 21.8                                 | 2988                             | 3000                             | 19.6                                              |
| 6      | 3122                             | 3134                             | 7.10                                 | 2990                             | 3002                             | 8.60                                              |
| 7      | 3047                             | 3064                             | 13.8                                 | 2934                             | 2951                             | 11.5                                              |
| 8      | 3044                             | 3060                             | 14.0                                 | 2946                             | 2962                             | 2.46                                              |
| 9      | 2754                             | 2751                             | 16.0                                 | 2650                             | 2647                             | 11.9                                              |
| 10     | 1520                             | 1524                             | 5.97                                 | 1479                             | 1484                             | 0.97                                              |
| 11     | 1502                             | 1506                             | 2.71                                 | 1463                             | 1467                             | 1.45                                              |
| 12     | 1495                             | 1500                             | 0.57                                 | 1458                             | 1463                             | 0.68                                              |
| 13     | 1486                             | 1490                             | 2.19                                 | 1445                             | 1449                             | 3.13                                              |
| 14     | 1469                             | 1474                             | 4.63                                 | 1430                             | 1435                             | 4.20                                              |
| 15     | 1416                             | 1418                             | 12.0                                 | 1382                             | 1384                             | 8.71                                              |
| 16     | 1403                             | 1402                             | 13.1                                 | 1370                             | 1370                             | 11.3                                              |
| 17     | 1293                             | 1291                             | 15.8                                 | 1254                             | 1253                             | 10.8                                              |
| 18     | 1289                             | 1280                             | 9.27                                 | 1235                             | 1226                             | 4.60                                              |
| 19     | 1172                             | 1167                             | 32.6                                 | 1150                             | 1145                             | 19.9                                              |
| 20     | 1041                             | 1043                             | 1.83                                 | 1024                             | 1026                             | 1.57                                              |
| 21     | 1019                             | 1016                             | 24.9                                 | 1011                             | 1008                             | 9.99                                              |
| 22     | 996                              | 994                              | 0.71                                 | 956                              | 955                              | 1.08                                              |
| 23     | 957                              | 962                              | 0.47                                 | 973                              | 978                              | 2.29                                              |
| 24     | 929                              | 930                              | 1.56                                 | 897                              | 898                              | 1.36                                              |
| 25     | 910                              | 914                              | 6.96                                 | 874                              | 878                              | 6.30                                              |
| 26     | 861                              | 848                              | 15.4                                 | 836                              | 823                              | 7.53                                              |
| 27     | 775                              | 773                              | 4.00                                 | 760                              | 757                              | 4.85                                              |
| 28     | 592                              | 596                              | 29.6                                 | 658                              | 662                              | 18.6                                              |
| 29     | 496                              | 498                              | 2.43                                 | 506                              | 507                              | 0.56                                              |
| 30     | 445                              | 451                              | 8.12                                 | 428                              | 434                              |                                                   |
| 31     | 394                              | 402                              | 2.98                                 | 386                              | 394                              |                                                   |
| 32     | 351                              | 354                              | 3.89                                 | 358                              | 360                              |                                                   |
| 33     | 328                              | 329                              | 5.89                                 | 322                              | 324                              |                                                   |
| 34     | 256                              | 256                              | 6.07                                 | 263                              | 263                              |                                                   |
| 35     | 253                              | 253                              | 0.26                                 | 246                              | 245                              |                                                   |
| 36     | 215                              | 210                              | 0.58                                 | 82                               | 78                               |                                                   |
| 37     | 179                              | 182                              | 55.4                                 | 33                               | 37                               |                                                   |
| 38     | 141                              | 140                              | 5.27                                 | 191                              | 190                              |                                                   |
| 39     | 117                              | 105                              | 6.36                                 | 181                              | 170                              |                                                   |

a. Obtained with the CCSD(T)-F12/cc-pVDZ-F12 level of theory.

b. Obtained with the B2PLYP-D3/cc-pVTZ level of theory.

c. Obtained combining the harmonic frequencies from the CCSD(T)-F12/cc-pVDZ-F12 method with the anharmonic corrections from the B2PLYP-D3/cc-pVTZ method, and used for the RRKM calculations.

d. Computed intensities for low frequency anharmonic vibrations (<500 cm<sup>-1</sup>) are not included.

Table S2: Calculated anharmonic frequency and intensity (VPT2) of the overtone OD stretch ( $2\nu_{\text{OD}}$ ) for •QOOD conformers (•QOOD1, •QOOD2, and •QOOD3) and TBDP using the B2PLYP-D3/cc-pVTZ level of theory.

| Species | Frequency<br>( $\text{cm}^{-1}$ ) | Intensity<br>( $\text{km mol}^{-1}$ ) |
|---------|-----------------------------------|---------------------------------------|
| •QOOD1  | 5200.7                            | 2.0                                   |
| •QOOD2  | 5218.7                            | 2.1                                   |
| •QOOD3  | 5224.1                            | 2.1                                   |
| TBDP    | 5228.9                            | 2.0                                   |

Table S3: Calculated contributions to the harmonic zero-point energy (ZPE) correction for the reactants ( $\bullet$ QOOH and  $\bullet$ QOOD), the corresponding transition state barriers (TS), and change in ZPE ( $\Delta$ ZPE). The resulting transition state barriers leading to OH/OD + cyclic ether products are also given.

| $\bullet$ QOOH (kcal mol <sup>-1</sup> ) |       |              |                    |
|------------------------------------------|-------|--------------|--------------------|
| ZPE harmonic                             |       | $\Delta$ ZPE | Barrier            |
| $\bullet$ QOOH                           | TS    |              |                    |
| 77.95                                    | 76.77 | 1.18         | 10.28 <sup>a</sup> |

  

| $\bullet$ QOOD (kcal mol <sup>-1</sup> ) |       |              |         |
|------------------------------------------|-------|--------------|---------|
| ZPE harmonic                             |       | $\Delta$ ZPE | Barrier |
| $\bullet$ QOOD                           | TS    |              |         |
| 75.87                                    | 74.86 | 1.01         | 10.45   |

a: Ref. 9.

Table S4: Calculated RRKM unimolecular microcanonical rates ( $k(E)$ , corresponds to  $k_{\text{rise}}$ ) and corresponding lifetimes ( $\tau$ ) calculated for unimolecular decay of  $\bullet\text{QOOD}$  and  $\bullet\text{QOOH}$  with tunneling.

| Energy<br>( $\text{cm}^{-1}$ ) | $\bullet\text{QOOD}$          |                   | $\bullet\text{QOOH}$          |                   |
|--------------------------------|-------------------------------|-------------------|-------------------------------|-------------------|
|                                | $k(E)$<br>( $\text{s}^{-1}$ ) | $\tau$<br>(ns)    | $k(E)$<br>( $\text{s}^{-1}$ ) | $\tau$<br>(ns)    |
| 2800                           | $9.13 \times 10^3$            | $110 \times 10^3$ | $1.71 \times 10^4$            | $583 \times 10^2$ |
| 2900                           | $1.62 \times 10^4$            | $618 \times 10^2$ | $3.04 \times 10^4$            | $329 \times 10^2$ |
| 3000                           | $2.88 \times 10^4$            | $348 \times 10^2$ | $5.39 \times 10^4$            | $185 \times 10^2$ |
| 3100                           | $5.11 \times 10^4$            | $196 \times 10^2$ | $9.55 \times 10^4$            | $105 \times 10^2$ |
| 3200                           | $9.05 \times 10^4$            | $111 \times 10^2$ | $1.69 \times 10^5$            | 5930              |
| 3300                           | $1.59 \times 10^5$            | 6270              | $2.96 \times 10^5$            | 3380              |
| 3400                           | $2.78 \times 10^5$            | 3590              | $5.12 \times 10^5$            | 1950              |
| 3500                           | $4.78 \times 10^5$            | 2090              | $8.64 \times 10^5$            | 1160              |
| 3600                           | $7.99 \times 10^5$            | 1250              | $1.41 \times 10^6$            | 711               |
| 3700                           | $1.29 \times 10^6$            | 777               | $2.20 \times 10^6$            | 455               |
| 3800                           | $1.99 \times 10^6$            | 502               | $3.30 \times 10^6$            | 303               |
| 3900                           | $2.97 \times 10^6$            | 336               | $4.79 \times 10^6$            | 209               |
| 4000                           | $4.29 \times 10^6$            | 233               | $6.75 \times 10^6$            | 148               |
| 4100                           | $6.01 \times 10^6$            | 166               | $9.24 \times 10^6$            | 108               |
| 4200                           | $8.21 \times 10^6$            | 122               | $1.24 \times 10^7$            | 80.5              |
| 4300                           | $1.09 \times 10^7$            | 91.4              | $1.62 \times 10^7$            | 61.6              |
| 4400                           | $1.43 \times 10^7$            | 69.7              | $2.09 \times 10^7$            | 47.9              |
| 4500                           | $1.85 \times 10^7$            | 54.1              | $2.65 \times 10^7$            | 37.7              |
| 4600                           | $2.35 \times 10^7$            | 42.6              | $3.31 \times 10^7$            | 30.2              |
| 4700                           | $2.93 \times 10^7$            | 34.1              | $4.08 \times 10^7$            | 24.5              |
| 4800                           | $3.62 \times 10^7$            | 27.6              | $4.99 \times 10^7$            | 20.1              |
| 4900                           | $4.42 \times 10^7$            | 22.6              | $6.02 \times 10^7$            | 16.6              |
| 5000                           | $5.34 \times 10^7$            | 18.7              | $7.19 \times 10^7$            | 13.9              |
| 5100                           | $6.39 \times 10^7$            | 15.7              | $8.53 \times 10^7$            | 11.7              |
| 5200                           | $7.59 \times 10^7$            | 13.2              | $1.00 \times 10^8$            | 9.97              |
| 5300                           | $8.94 \times 10^7$            | 11.2              | $1.17 \times 10^8$            | 8.52              |
| 5400                           | $1.04 \times 10^8$            | 9.58              | $1.36 \times 10^8$            | 7.35              |
| 5500                           | $1.22 \times 10^8$            | 8.23              | $1.57 \times 10^8$            | 6.36              |
| 5600                           | $1.40 \times 10^8$            | 7.15              | $1.80 \times 10^8$            | 5.55              |
| 5700                           | $1.61 \times 10^8$            | 6.22              | $2.05 \times 10^8$            | 4.88              |
| 5800                           | $1.84 \times 10^8$            | 5.45              | $2.34 \times 10^8$            | 4.28              |
| 5900                           | $2.09 \times 10^8$            | 4.78              | $2.64 \times 10^8$            | 3.79              |
| 6000                           | $2.36 \times 10^8$            | 4.23              | $2.97 \times 10^8$            | 3.37              |
| 6100                           | $2.66 \times 10^8$            | 3.75              | $3.33 \times 10^8$            | 3.01              |
| 6200                           | $2.99 \times 10^8$            | 3.34              | $3.71 \times 10^8$            | 2.69              |
| 6300                           | $3.35 \times 10^8$            | 2.99              | $4.13 \times 10^8$            | 2.42              |
| 6400                           | $3.73 \times 10^8$            | 2.68              | $4.58 \times 10^8$            | 2.18              |
| 6500                           | $4.14 \times 10^8$            | 2.42              | $5.06 \times 10^8$            | 1.98              |
| 6600                           | $4.58 \times 10^8$            | 2.18              | $5.58 \times 10^8$            | 1.79              |
| 6700                           | $5.05 \times 10^8$            | 1.98              | $6.13 \times 10^8$            | 1.63              |
| 6800                           | $5.56 \times 10^8$            | 1.80              | $6.71 \times 10^8$            | 1.49              |
| 6900                           | $6.10 \times 10^8$            | 1.64              | $7.34 \times 10^8$            | 1.36              |

---

|      |                    |      |                    |      |
|------|--------------------|------|--------------------|------|
| 7000 | $6.67 \times 10^8$ | 1.50 | $8.01 \times 10^8$ | 1.25 |
| 7100 | $7.28 \times 10^8$ | 1.37 | $8.71 \times 10^8$ | 1.15 |
| 7200 | $7.93 \times 10^8$ | 1.26 | $9.46 \times 10^8$ | 1.06 |
| 7300 | $8.61 \times 10^8$ | 1.16 | $1.02 \times 10^9$ | 0.98 |
| 7400 | $9.34 \times 10^8$ | 1.07 | $1.11 \times 10^9$ | 0.90 |
| 7500 | $1.01 \times 10^9$ | 0.99 | $1.19 \times 10^9$ | 0.84 |
| 7600 | $1.09 \times 10^9$ | 0.92 | $1.29 \times 10^9$ | 0.77 |
| 7700 | $1.17 \times 10^9$ | 0.85 | $1.39 \times 10^9$ | 0.72 |
| 7800 | $1.27 \times 10^9$ | 0.79 | $1.48 \times 10^9$ | 0.67 |
| 7900 | $1.36 \times 10^9$ | 0.74 | $1.59 \times 10^9$ | 0.63 |
| 8000 | $1.46 \times 10^9$ | 0.69 | $1.70 \times 10^9$ | 0.59 |
| 8100 | $1.56 \times 10^9$ | 0.64 | $1.82 \times 10^9$ | 0.55 |
| 8200 | $1.67 \times 10^9$ | 0.60 | $1.94 \times 10^9$ | 0.52 |
| 8300 | $1.78 \times 10^9$ | 0.56 | $2.06 \times 10^9$ | 0.48 |
| 8400 | $1.90 \times 10^9$ | 0.53 | $2.20 \times 10^9$ | 0.45 |
| 8500 | $2.02 \times 10^9$ | 0.49 | $2.33 \times 10^9$ | 0.43 |
| 8600 | $2.15 \times 10^9$ | 0.47 | $2.48 \times 10^9$ | 0.40 |
| 8700 | $2.28 \times 10^9$ | 0.44 | $2.62 \times 10^9$ | 0.38 |

---

## References

1. A. S. Hansen, R. M. Huchmala, E. Vogt, M. A. Boyer, T. Bhagde, M. F. Vansco, C. V. Jensen, A. Kjærsgaard, H. G. Kjaergaard, A. B. McCoy and M. I. Lester, *J. Chem. Phys.*, 2021, **154**, 164306.
2. J. Sharpless and T. R. Verhoeven, *Aldrichimica Acta.*, 1979, **12**, 63-74.
3. S. J. Blanksby and G. B. Ellison, *Acc. Chem. Res.*, 2003, **36**, 255-263.
4. F. Liu, J. M. Beames, A. S. Petit, A. B. McCoy and M. I. Lester, *Science*, 2014, **345**, 1596-1598.
5. F. Liu, J. M. Beames and M. I. Lester, *J. Chem. Phys.*, 2014, **141**, 234312.
6. S. Hsieh, R. Vushe, Y. T. Tun and J. L. Vallejo, *Chem. Phys. Lett.*, 2014, **591**, 99-102.
7. Y. Fang, F. Liu, V. P. Barber, S. J. Klippenstein, A. B. McCoy and M. I. Lester, *J. Chem. Phys.*, 2016, **144**, 061102.
8. V. P. Barber, S. Pandit, A. M. Green, N. Trongsirawat, P. J. Walsh, S. J. Klippenstein and M. I. Lester, *J. Am. Chem. Soc.*, 2018, **140**, 10866-10880.
9. A. S. Hansen, T. Bhagde, K. B. Moore, D. R. Moberg, A. W. Jasper, Y. Georgievskii, M. F. Vansco, S. J. Klippenstein and M. I. Lester, *Science*, 2021, **373**, 679-682.
10. A. S. Hansen, T. Bhagde, Y. Qian, A. Cavazos, R. M. Huchmala, M. A. Boyer, C. F. Gavin-Hanner, S. J. Klippenstein, A. B. McCoy and M. I. Lester, *J. Chem. Phys.*, 2022, **156**, 014301.
